# Supplementary material
Source: PubMed Central journal article supplement (PMC6796937)
Supplement: ao9b02185_si_001.pdf [file ao9b02185_si_001.pdf]

Supporting Information

**Ultra-high selective room temperature ammonia gas sensor based on tin-titanium dioxide/reduced graphene/carbon nanotube nanocomposites by solvothermal method**

Yotsarayuth Seekaew, Weeraphat Pon-On and Chatchawal Wongchoosuk\*

Department of Physics, Faculty of Science, Kasetsart University, Chatuchak, Bangkok 10900

Thailand

\*Corresponding author. Tel.: +662-562-5555; Fax: +662-942-8029.

E-mail: [chatchawal.w@ku.ac.th](mailto:chatchawal.w@ku.ac.th) (Chatchawal Wongchoosuk)

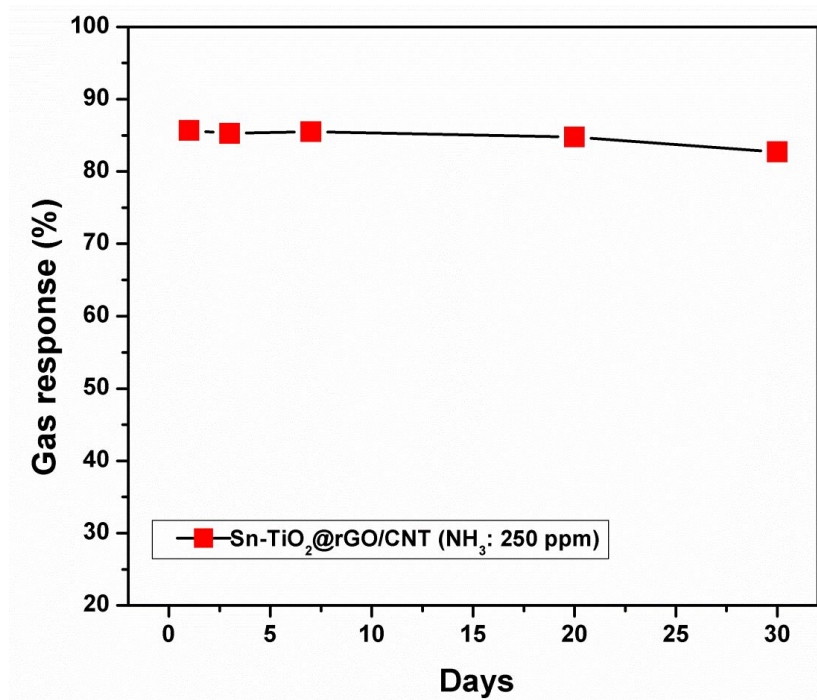

**Figure S1:** Stability of the Sn-TiO<sub>2</sub>@rGO/CNT nanocomposite gas sensor (nanocomposite I) toward 250 ppm ammonia for 30 days at room temperature.

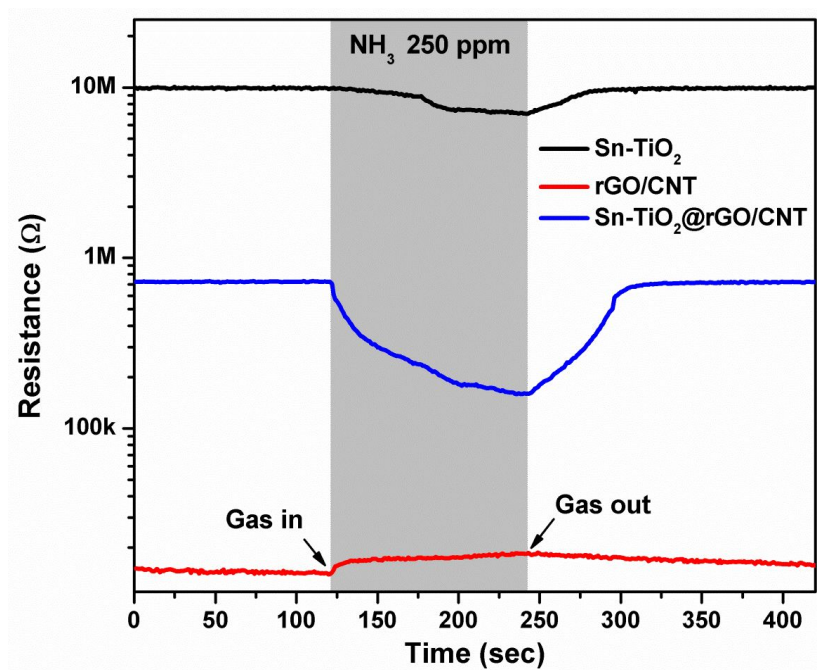

**Figure S2:** Changes in resistance of Sn-TiO<sub>2</sub>, rGO/CNT and Sn-TiO<sub>2</sub>@rGO/CNT nanocomposite I gas sensors to 250 ppm ammonia at room temperature.

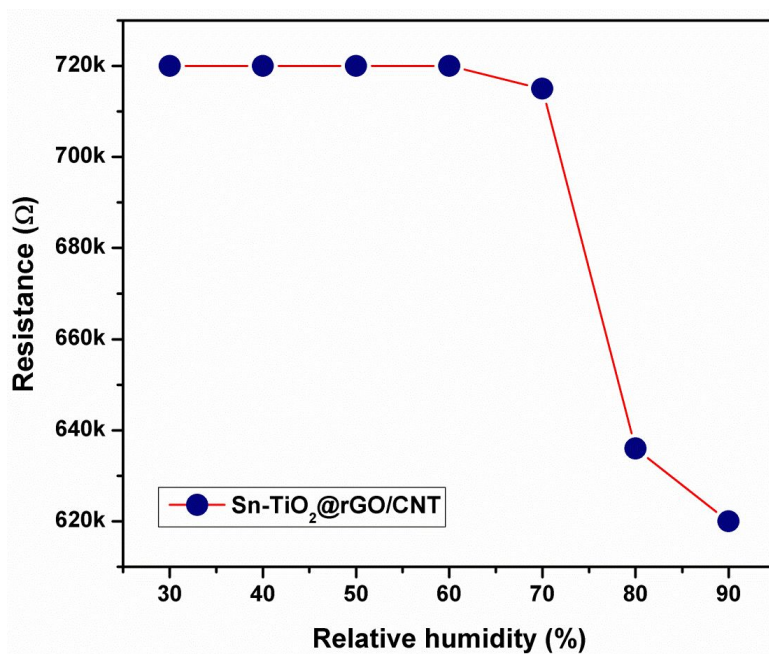

**Figure S3:** Resistance of the Sn-TiO<sub>2</sub>@rGO/CNT nanocomposite gas sensor (nanocomposite I) as a function of relative humidity (%RH) at room temperature.
